# Supplementary material for: Seeing It All: Evaluating Supervised Machine Learning Methods for the Classification of Diverse Otariid Behaviours
Source: PubMed Central journal article supplement (PMC5176164; doi:10.1371/journal.pone.0166898), 2016-12-21
Supplement: pone.0166898.s001.pdf [file pone.0166898.s001.pdf]

**S1 File. Description and acceleration profile for 26 unique behaviours recorded.** Black line – x axis acceleration; grey line – y axis acceleration; orange line – z axis acceleration.

Behaviour Behaviour description

*RESTING*

---

Lying

Full body contact to the ground with minimal movement

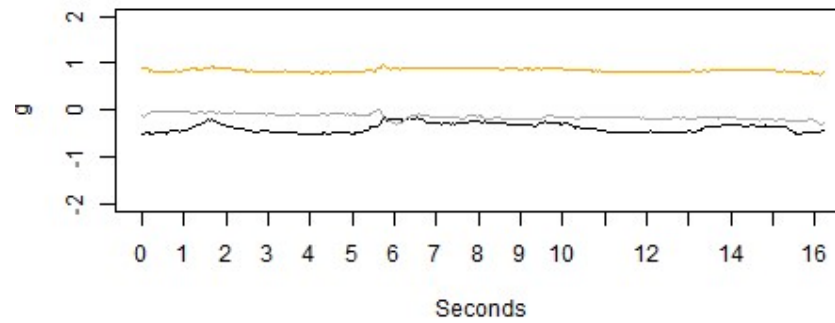

Sitting

Perched on fore-flippers with rear on ground, head up and alert with minimal movement

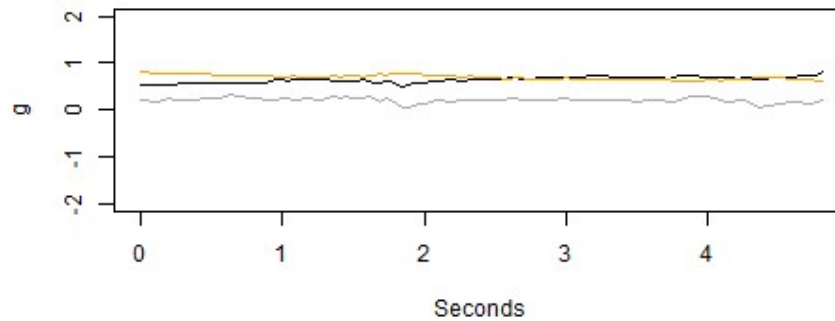

Behaviour

Behaviour description

Still

Floating at the surface or beneath the surface of the water with no movement

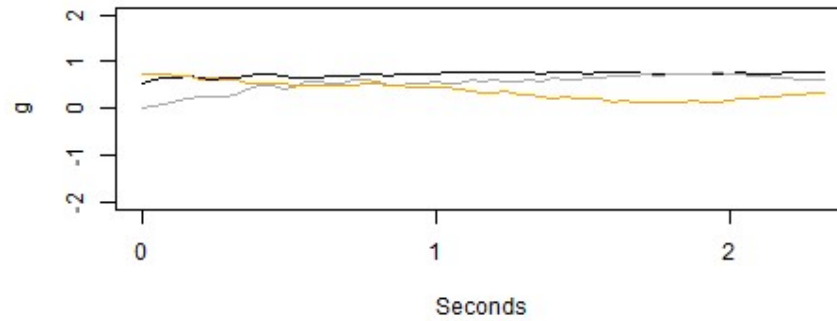

GROOMING

Scratch

Perched on fore-flippers with rear on ground, head down towards rear and one rear flipper scratching neck or head

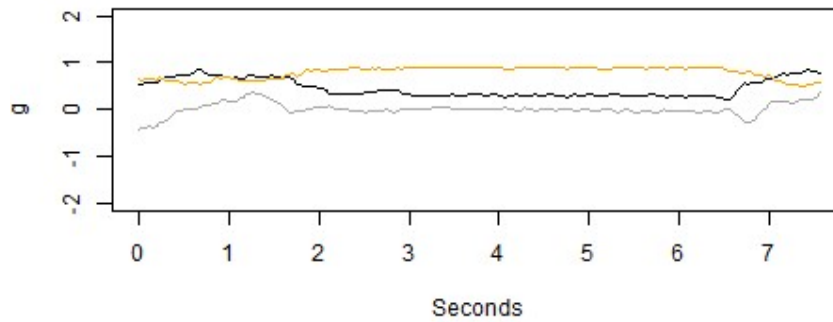

Behaviour

Behaviour description

---

Rubbing

Using the fore-flipper to rub the fur on the rump

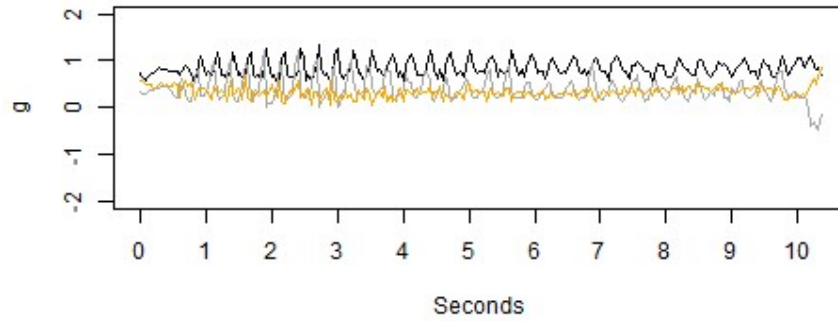

Sailing

Lie vertically in the water with one flipper in the air

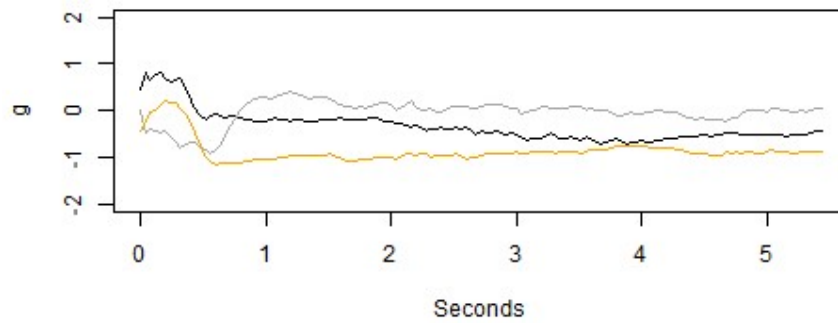

Juggling

Hanging upside down in water with hind flippers in the air

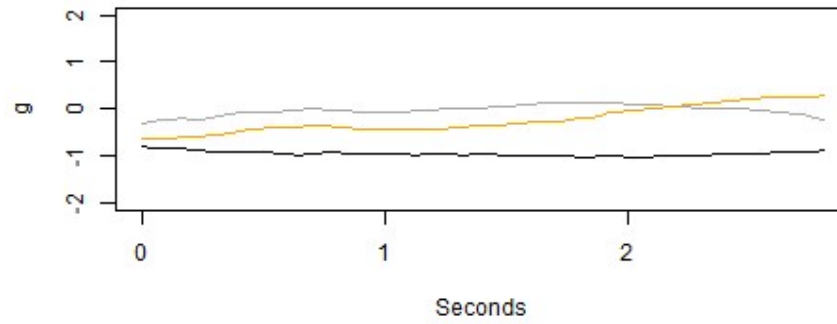

Behaviour

Behaviour description

---

Facerub

Using fore-flippers to rub face and whiskers

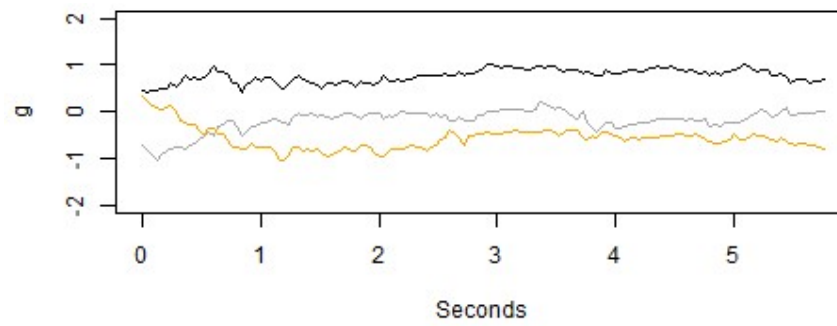

Shake

Short and sharp movement of the head left and right to remove water from the fur

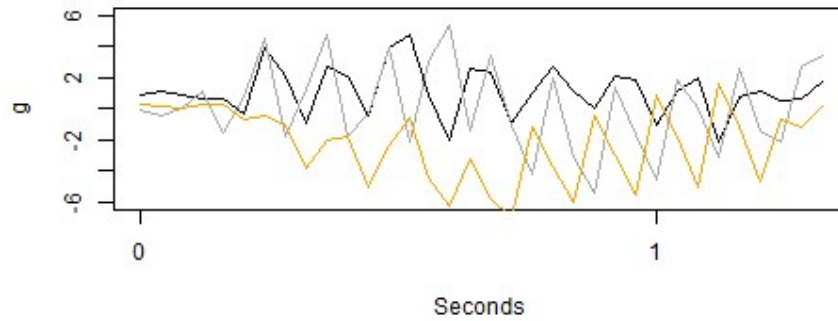

Rolling

Rolling at the surface of the water and rubbing fur with the flippers (Liwang 2010)

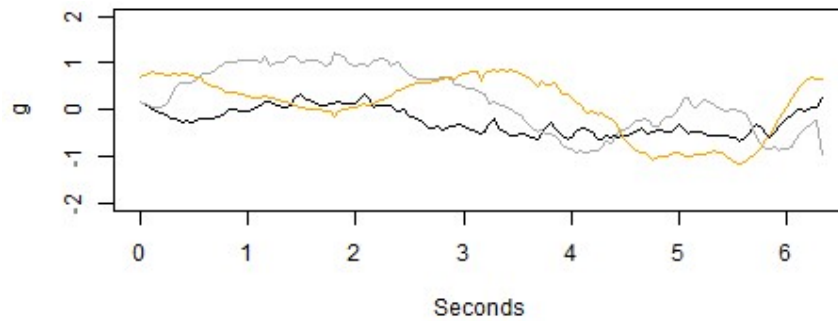

Behaviour

Behaviour description

---

TRAVELLING

---

Moving

Locomotion out of water, four flippers used as legs, stomach does not touch the ground

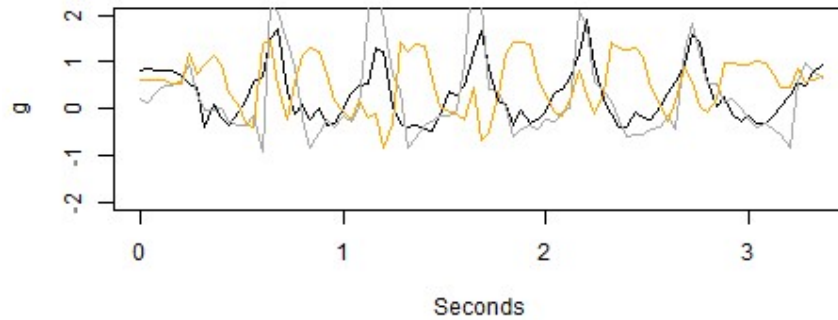

Slow

Locomotion at the surface of the water, using fore-flippers to move forward

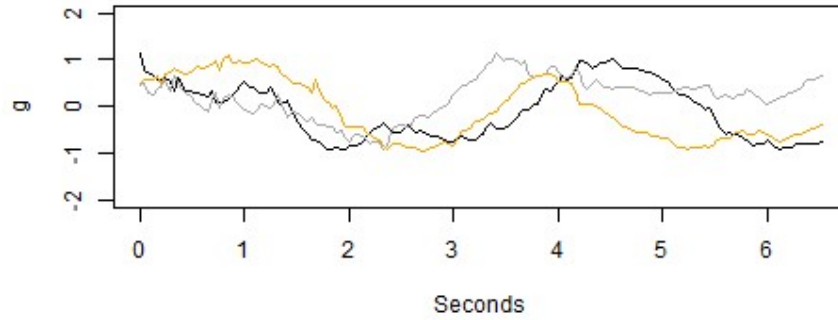

Behaviour

Behaviour description

Swimming

Locomotion below the surface of the water using front flippers for propulsion

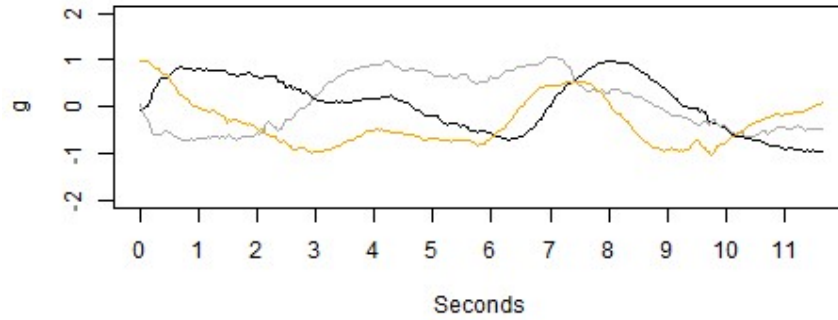

Fast

Rigorous propulsion of the fore-flippers at the surface of the water to accelerate (preceded by a small jump and followed by a glide)

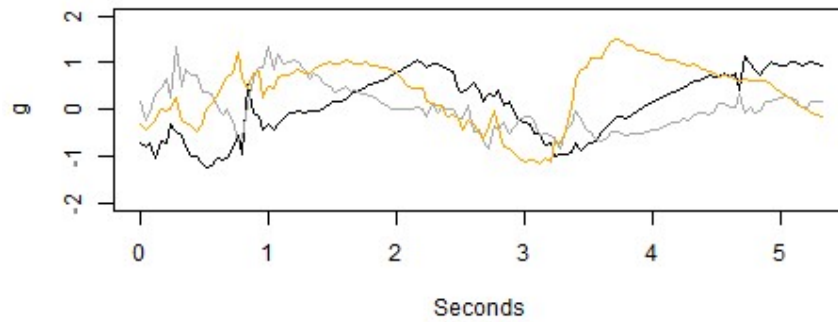

Porpoising

Fast swimming near the surface accompanied by parabolic leaps (Au and Weihs, 1980)

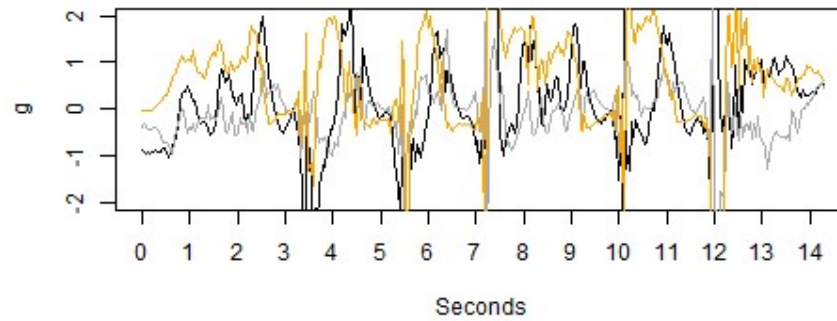

Behaviour

Behaviour description

---

FEEDING

---

Chewing

large head movement at the surface of the water to break food

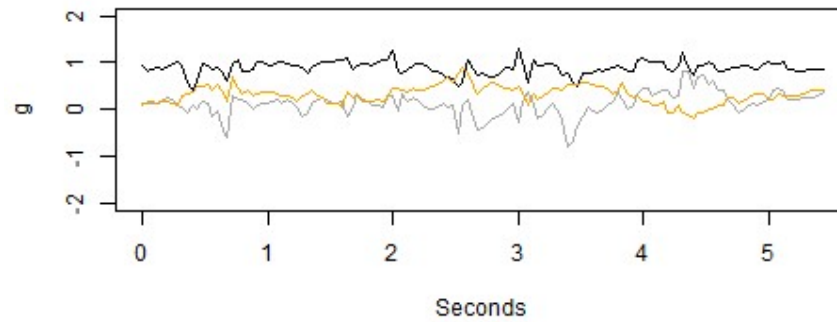

Searching

Locomotion below 1m actively searching for or manipulating food

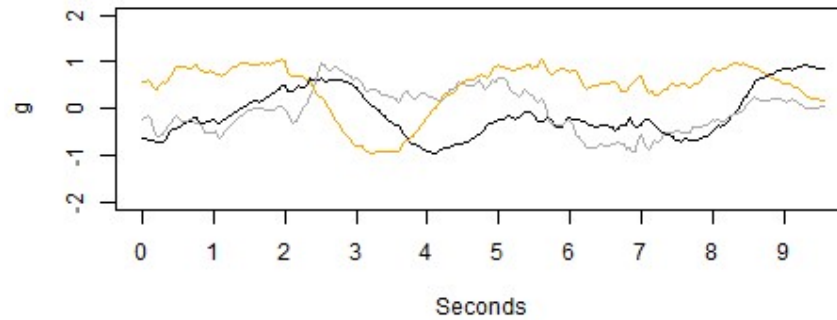

Behaviour

Behaviour description

Capture

Head strike to capture food from the water column while swimming

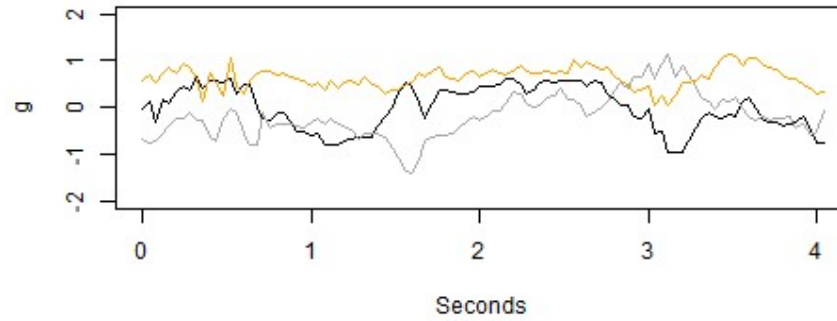

Thrash

Quick movement of the head back and forth while holding a prey item between teeth  
Elongated movement of the head back and forth with the purpose of breaking prey

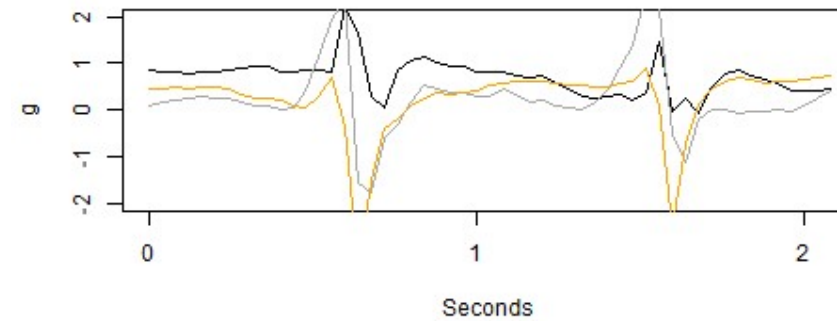

Manipulation  
[prey handling]

moving prey at the surface of the water (>1m) to manipulate into the best position for consumption

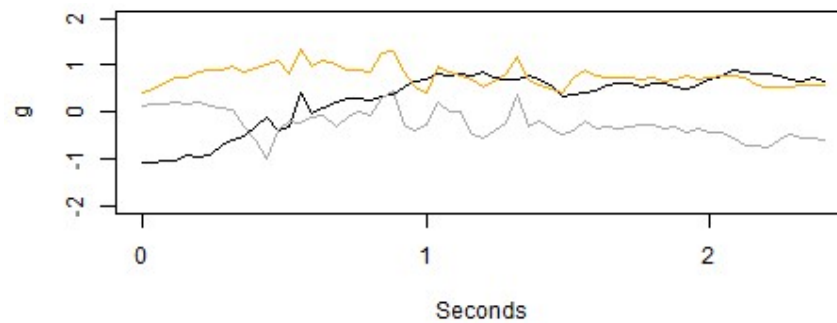



Behaviour Behaviour description

---

Holdntear

Grip prey between the fore-flippers in an upright position and use teeth to tear pieces of fish from the body

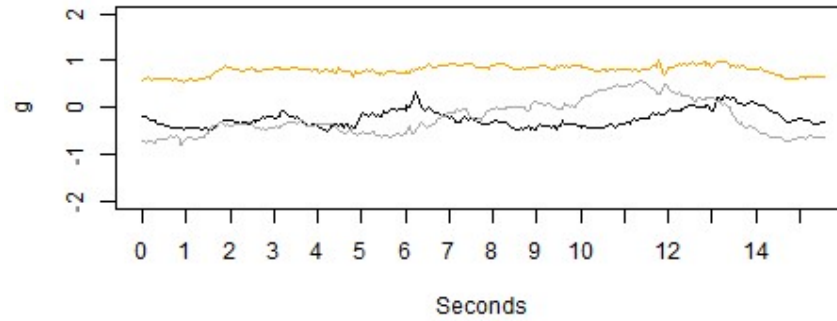

More

Description

---

Playing

Rapid movements when interacting with other seals

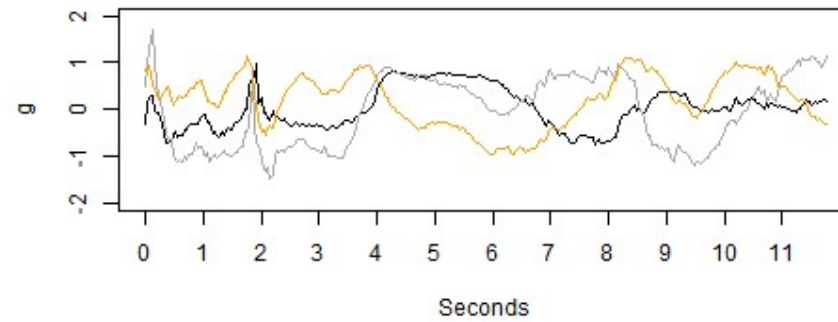

Other

in/out/jump/eating
